# Supplementary material for: Hippocampal synaptic failure is an early event in experimental parkinsonism with subtle cognitive deficit
Source: PubMed Central journal article supplement — Brain. 2023 Jul 4;146(12):4949–63. doi: 10.1093/brain/awad227 (PMC10690043; doi:10.1093/brain/awad227), 2023-07-04
Supplement: awad227_supplementary_data.pdf [file awad227_supplementary_data.pdf]

# Supplementary Material

## Supplementary Figures

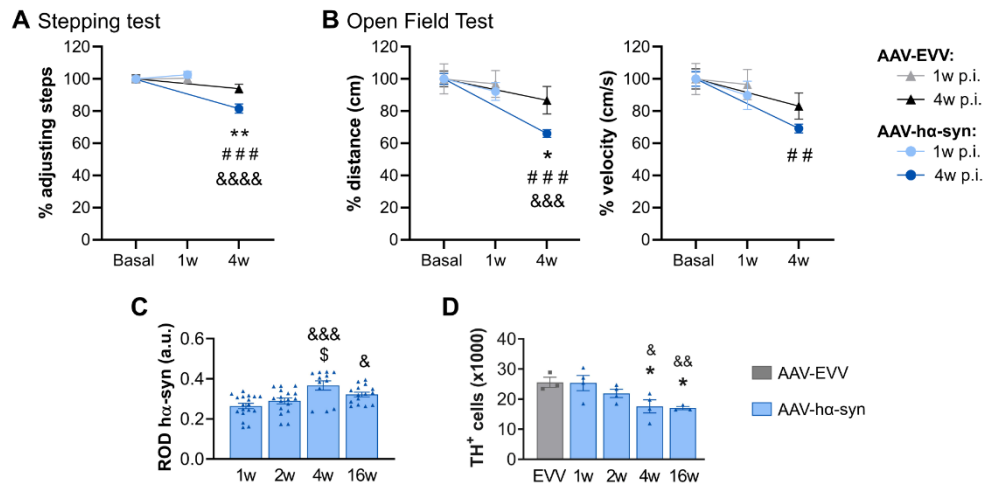

**Supplementary Figure 1. Confirmation of the animal model of experimental parkinsonism.** (A) Stepping test. (B) Open field test. All values at each time-point were normalized to their corresponding basal values and represented as a percentage (%). The values are represented as the mean  $\pm$  SEM and analyzed with a two-way ANOVA followed by a Bonferroni's *post hoc* test:  $^{##}P < 0.01$ ,  $^{###}P < 0.001$  vs. basal;  $^{*}P < 0.05$ ,  $^{**}P < 0.01$  vs. AAV-EVV;  $^{\&\&\&}P < 0.001$ ,  $^{\&\&\&\&}P < 0.0001$  vs. 1 week p.i. ( $n = 8$  for each group and time-point). (C) Relative optical density (ROD) analysis of hα-syn expression in the SNpc of the AAV-hα-syn rats at 1, 2, 4 and 16 weeks (w) p.i. (D) Quantification of TH<sup>+</sup> SNpc neurons from the AAV-EVV and AAV-hα-syn rats at 1, 2, 4 and 16 weeks p.i. All values are presented as the mean  $\pm$  SEM and analyzed with a Kruskal-Wallis test followed by a Dunn's *post hoc* test:  $^{\&}P < 0.05$ ,  $^{\&\&}P < 0.01$ ,  $^{\&\&\&}P < 0.001$  vs. 1 week p.i.;  $^{\$}P < 0.05$  vs. 2 weeks p.i.;  $^{*}P < 0.05$ , vs. AAV-EVV ( $n = 4$  for each group and time-point).

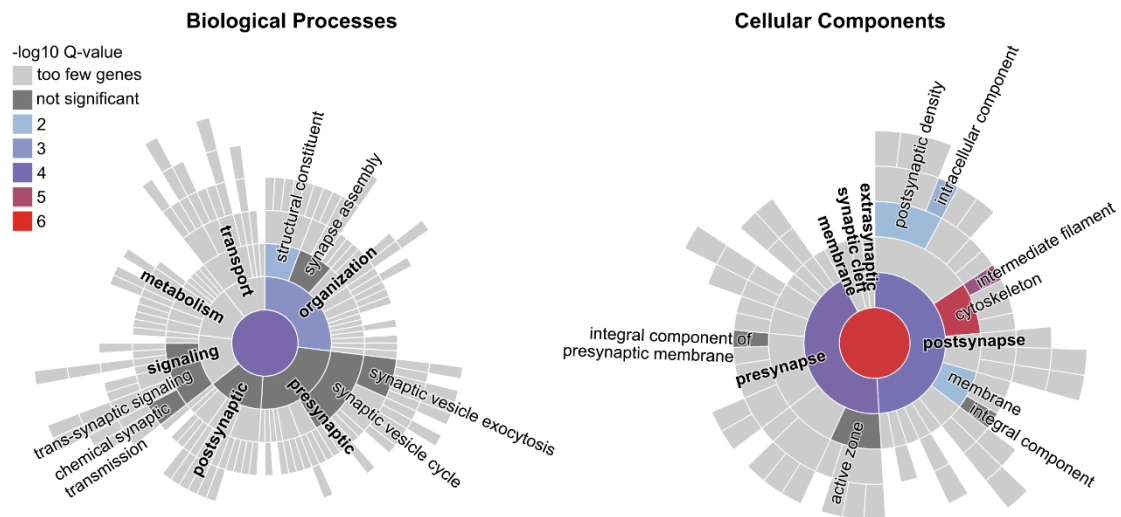

**Supplementary Figure 2. Synaptic ontology analysis.** Synaptic biological processes and structural components across the deregulated proteome from the AAV- $\alpha$ -syn rats.

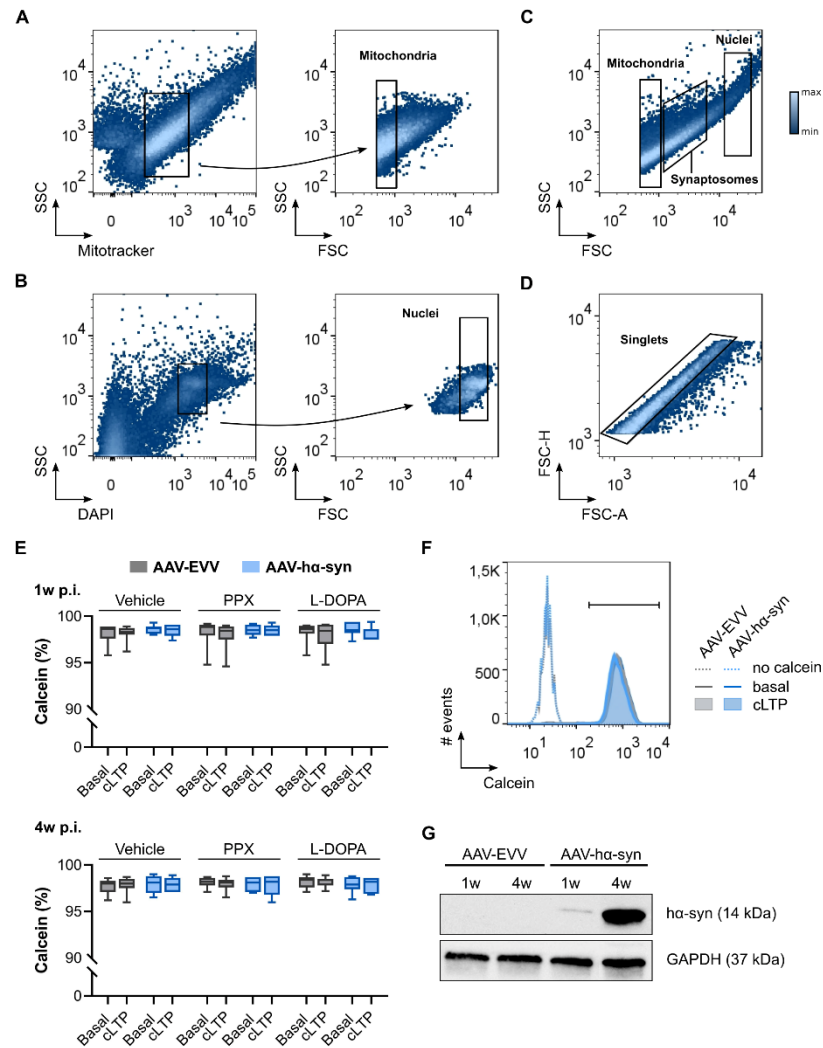

**Supplementary Figure 3. Analysis of the FASS-LTP experiments.** (A) Selection of the “mitochondria” size gate ( $\sim 0.5 \mu\text{m}$ ) based on the Mitotracker staining of isolated mitochondria. (B) Selection of the “nuclei” size gate ( $\sim 8 \mu\text{m}$ ) based on DAPI staining of isolated nuclei. (C) Representation of the “mitochondria” and “nuclei” size gates in synaptosomes isolated from the brain, and a selection of the “synaptosome” size gate ( $\sim 0.75$  to  $3 \mu\text{m}$ ). (D) Selection of single particles (singlets). (E) Calcein AM fluorescence (%) in synaptosomes isolated from the AAV-EVV and AAV-h $\alpha$ -syn animals at 1 and 4 weeks (w) p.i. at the basal state and following cLTP stimulation, when exposed to the vehicle, PPX or L-DOPA. Two-way ANOVA followed by a Bonferroni’s *post hoc* test: no significant differences were found ( $n = 8$  for each group, time-point and treatment). (F) Representative Calcein AM staining in synaptosomes isolated from AAV-EVV and AAV-h $\alpha$ -syn animals in the basal state and following cLTP stimulation, and the corresponding negative controls. (G) Confirmation of h $\alpha$ -syn expression in the midbrain of AAV-EVV and AAV-h $\alpha$ -syn animals at 1 and 4 weeks p.i.

## Supplementary Tables

Supplementary Table 1. Significant deregulated proteins in hippocampal synaptosomes in the AVV-ha-syn group

| Description                                                             | Gene Name      | Uniprot    | Peptide Count | Ratio  | P value |
|-------------------------------------------------------------------------|----------------|------------|---------------|--------|---------|
| <b>1 week p.i.</b>                                                      |                |            |               |        |         |
| <b>Down-regulated proteins</b>                                          |                |            |               |        |         |
| LETM1 domain containing 1                                               | <i>Letmd1</i>  | G3V996     | 2             | 0.3578 | 0.0104  |
| Isoamyl acetate hydrolyzing esterase 1                                  | <i>Iah1</i>    | Q711G3     | 2             | 0.4028 | 0.0106  |
| Formin-like 2                                                           | <i>Fmn12</i>   | A0A0G2K132 | 2             | 0.4587 | 0.0468  |
| Galactosylceramidase                                                    | <i>Galc</i>    | G3V6H1     | 2             | 0.5246 | 0.0312  |
| Amyloid beta precursor protein                                          | <i>App</i>     | P08592     | 5             | 0.5358 | 0.0206  |
| Eukaryotic translation initiation factor 3, subunit B                   | <i>Eif3b</i>   | Q4G061     | 3             | 0.5842 | 0.0434  |
| Lymphocyte cytosolic protein 1                                          | <i>Lcp1</i>    | Q5X138     | 3             | 0.6167 | 0.0132  |
| UFM1-specific peptidase 2                                               | <i>Ufsp2</i>   | Q5XIB4     | 4             | 0.6344 | 0.0120  |
| Myelin oligodendrocyte glycoprotein                                     | <i>Mog</i>     | Q6MFX9     | 8             | 0.6643 | 0.0102  |
| Inositol polyphosphate-4-phosphatase type 1 A                           | <i>Inpp4a</i>  | D3ZBL5     | 10            | 0.6832 | 0.0161  |
| Heme oxygenase 2                                                        | <i>Hmox2</i>   | P23711     | 8             | 0.6918 | 0.0168  |
| Myelin basic protein                                                    | <i>Mbp</i>     | P02688     | 4             | 0.6924 | 0.0129  |
| 60S ribosomal protein L36                                               | n.a.           | D3ZZ95     | 3             | 0.6926 | 0.0085  |
| PBX homeobox interacting protein 1                                      | <i>Pbxip1</i>  | A2VD12     | 3             | 0.7027 | 0.0482  |
| Neurofilament medium                                                    | <i>Nefm</i>    | P12839     | 16            | 0.7096 | 0.0125  |
| Lymphocyte antigen 6 family member H                                    | <i>Ly6h</i>    | F1LNW6     | 3             | 0.7111 | 0.0002  |
| Chloride intracellular channel 4                                        | <i>Clic4</i>   | G3V8C4     | 2             | 0.7161 | 0.0457  |
| Ras homolog family member G                                             | <i>Rhog</i>    | Q32PX6     | 5             | 0.7182 | 0.0153  |
| Oligodendrocytic myelin paranodal and inner loop protein                | <i>Opalin</i>  | Q56A26     | 2             | 0.7188 | 0.0016  |
| Aminoacyl tRNA synthetase complex-interacting multifunctional protein 1 | <i>Aimp1</i>   | Q4G079     | 2             | 0.7188 | 0.0118  |
| Carboxypeptidase M                                                      | <i>Cpm</i>     | D4A9Q5     | 3             | 0.7278 | 0.0043  |
| 2',3'-cyclic nucleotide 3' phosphodiesterase                            | <i>Cnp</i>     | P13233     | 17            | 0.7369 | 0.0025  |
| Internexin neuronal intermediate filament protein, alpha                | <i>Ina</i>     | P23565     | 2             | 0.7442 | 0.0057  |
| Ataxin 2-like                                                           | <i>Atxn2l</i>  | B3DMA1     | 3             | 0.7543 | 0.0309  |
| ATP synthase membrane subunit f                                         | <i>Atp5mf</i>  | D3ZAF6     | 2             | 0.7584 | 0.0412  |
| Brain enriched myelin associated protein 1                              | <i>Bcas1</i>   | A0A0G2K079 | 7             | 0.7606 | 0.0490  |
| Serine/threonine kinase receptor associated protein                     | <i>Strap</i>   | Q5XIG8     | 5             | 0.7617 | 0.0245  |
| F-box protein 2                                                         | <i>Fbxo2</i>   | G3V774     | 6             | 0.7632 | 0.0488  |
| <b>Up-regulated proteins</b>                                            |                |            |               |        |         |
| Myotubularin related protein 9                                          | <i>Mtmr9</i>   | Q5XIN4     | 3             | 1.3118 | 0.0103  |
| Mitogen activated protein kinase kinase 1                               | <i>Map2k1</i>  | Q01986     | 2             | 1.3137 | 0.0342  |
| Synuclein, beta                                                         | <i>Sncb</i>    | A0A0G2JSQ1 | 4             | 1.3199 | 0.0009  |
| Stathmin 1                                                              | <i>Stmn1</i>   | P13668     | 2             | 1.3202 | 0.0036  |
| Dehydrogenase/reductase 7                                               | <i>Dhrs7</i>   | D4A0T8     | 2             | 1.3214 | 0.0175  |
| Microtubule-associated protein 2                                        | <i>Map2</i>    | F1LNK0     | 2             | 1.3293 | 0.0413  |
| Solute carrier family 4 member 8                                        | <i>Slc4a8</i>  | F1LUB7     | 3             | 1.3336 | 0.0254  |
| DnaJ heat shock protein family (Hsp40) member B12                       | <i>Dnajb12</i> | Q5FVC4     | 2             | 1.3358 | 0.0128  |
| Poly(A) binding protein interacting protein 1                           | <i>Paip1</i>   | D3ZZF8     | 2             | 1.3401 | 0.0357  |
| Kinesin light chain 2                                                   | <i>Klc2</i>    | B2GV74     | 6             | 1.3522 | 0.0215  |
| Annexin A7                                                              | <i>Anxa7</i>   | Q6IRJ7     | 11            | 1.3583 | 0.0339  |
| Protein tyrosine phosphatase, receptor type, G                          | <i>Ptprg</i>   | F1LP13     | 3             | 1.3724 | 0.0490  |
| Solute carrier family 7, member 14                                      | <i>Slc7a14</i> | A0A0G2K1G8 | 3             | 1.4000 | 0.0251  |
| RAB6B, member RAS oncogene family                                       | <i>Rab6b</i>   | A0A0G2JT78 | 3             | 1.5058 | 0.0014  |
| RAB11 binding and LisH domain, coiled-coil and HEAT repeat containing   | <i>Relch</i>   | D3ZJ01     | 7             | 1.5081 | 0.0501  |
| Phosphofurin acidic cluster sorting protein 1                           | <i>Pacs1</i>   | F1LPG3     | 13            | 1.5500 | 0.0299  |

|                                                |                 |            |   |        |        |
|------------------------------------------------|-----------------|------------|---|--------|--------|
| Tumor protein, translationally-controlled 1    | <i>Tpt1</i>     | P63029     | 2 | 1.6134 | 0.0100 |
| Translocase of inner mitochondrial membrane 21 | <i>Timm21</i>   | Q5U2X7     | 2 | 1.7867 | 0.0203 |
| Dispatched RND transporter family member 2     | <i>Disp2</i>    | D3ZBZ6     | 2 | 1.9177 | 0.0102 |
| Keratin 1                                      | <i>Krt1</i>     | A0A0G2JST3 | 3 | 1.9489 | 0.0301 |
| Rho GTPase activating protein 32               | <i>Arhgap32</i> | F1MAK3     | 2 | 2.6862 | 0.0199 |
| PiggyBac transposable element derived 5        | <i>Pgbd5</i>    | D3ZSZ4     | 2 | 3.0636 | 0.0313 |
| Mitochondrial ribosomal protein S30            | <i>Mrps30</i>   | D4A833     | 2 | 3.8968 | 0.0138 |

## 2 weeks p.i.

### Down-regulated proteins

|                                                         |                     |            |    |        |        |
|---------------------------------------------------------|---------------------|------------|----|--------|--------|
| Myosin heavy chain 14                                   | <i>Myh14</i>        | F1LNF0     | 2  | 0.1059 | 0.0035 |
| ZW10 interacting kinetochore protein                    | <i>Zwint</i>        | Q8VIL3     | 2  | 0.3496 | 0.0387 |
| LDL receptor related protein 1                          | <i>Lrp1</i>         | G3V928     | 3  | 0.3845 | 0.0015 |
| Mitochondrial ribosomal protein L12                     | <i>Mrpl12</i>       | D3ZXF9     | 2  | 0.4672 | 0.0418 |
| VPS33B, late endosome and lysosome associated           | <i>Vps33b</i>       | Q63616     | 3  | 0.4868 | 0.0091 |
| Ral GTPase activating protein catalytic subunit alpha 1 | <i>Ralgapa1</i>     | O55007     | 2  | 0.5106 | 0.0051 |
| Acyl-CoA synthetase short-chain family member 2         | <i>Acss2</i>        | G3V9U0     | 2  | 0.5376 | 0.0023 |
| IQ motif and Sec7 domain ArfGEF 2                       | <i>Iqsec2</i>       | A0A0G2JZX5 | 3  | 0.5455 | 0.0000 |
| Phosphodiesterase 4D                                    | <i>Pde4d</i>        | A0A140TAB1 | 2  | 0.5598 | 0.0326 |
| Hemoglobin subunit beta-2                               | n.a.                | P11517     | 2  | 0.6217 | 0.0075 |
| TPD52 like 2                                            | <i>Tpd52l2</i>      | Q6PCT3     | 3  | 0.6272 | 0.0386 |
| Trafficking protein particle complex 3                  | <i>Trappc3</i>      | Q5U1Z2     | 4  | 0.6340 | 0.0201 |
| Synaptosome associated protein 29                       | <i>Snap29</i>       | Q9J156     | 2  | 0.6437 | 0.0118 |
| Neurofilament heavy                                     | <i>Nefh</i>         | F1LRZ7     | 7  | 0.6553 | 0.0483 |
| Hemoglobin subunit beta-2-like                          | <i>LOC103694855</i> | Q62669     | 3  | 0.7163 | 0.0308 |
| Tropomyosin 1                                           | <i>Tpm1</i>         | A0A0G2JSQ4 | 2  | 0.7164 | 0.0418 |
| VPS52 subunit of GARP complex                           | <i>Vps52</i>        | O55166     | 5  | 0.7251 | 0.0026 |
| Cytochrome c oxidase subunit 5A                         | <i>Cox5a</i>        | P11240     | 6  | 0.7300 | 0.0411 |
| Protein phosphatase 1, regulatory subunit 9A            | <i>Ppp1r9a</i>      | O35867     | 2  | 0.7412 | 0.0293 |
| Myosin VA                                               | <i>Myo5a</i>        | A0A0G2K4Y7 | 17 | 0.7465 | 0.0004 |
| Proline-rich transmembrane protein 2                    | <i>Prrt2</i>        | D3ZFB6     | 3  | 0.7671 | 0.0394 |

### Up-regulated proteins

|                                                                  |               |            |   |        |        |
|------------------------------------------------------------------|---------------|------------|---|--------|--------|
| Pleckstrin and Sec7 domain containing                            | <i>Psd</i>    | G3V8J5     | 6 | 1.3500 | 0.0349 |
| Cysteine and glycine-rich protein 1                              | <i>Csrp1</i>  | P47875     | 8 | 1.3669 | 0.0176 |
| Transmembrane 9 superfamily member 4                             | <i>Tm9sf4</i> | A0A0G2KA25 | 3 | 1.3687 | 0.0113 |
| Pleckstrin and Sec7 domain containing 3                          | <i>Psd3</i>   | D4A2Q3     | 2 | 1.3898 | 0.0193 |
| Ras homolog, mTORC1 binding                                      | <i>Rheb</i>   | Q62639     | 3 | 1.3970 | 0.0371 |
| BCS1 homolog, ubiquinol-cytochrome c reductase complex chaperone | <i>Bcs1l</i>  | Q5XIM0     | 9 | 1.3998 | 0.0103 |
| Sodium voltage-gated channel beta subunit 1                      | <i>Scn1b</i>  | A0A0G2JXY6 | 2 | 1.4070 | 0.0262 |
| Radixin                                                          | <i>Rdx</i>    | E9PT65     | 4 | 1.4076 | 0.0462 |
| TAR DNA binding protein                                          | <i>Tardbp</i> | I6L9G6     | 3 | 1.4939 | 0.0096 |
| Mitochondrial ribosomal protein L10                              | <i>Mrpl10</i> | D3ZX69     | 2 | 1.5872 | 0.0449 |
| Signal recognition particle 54A                                  | <i>Srp54</i>  | Q6AYB5     | 3 | 1.5927 | 0.0276 |
| Inositol polyphosphate-4-phosphatase type 1 A                    | <i>Inpp4a</i> | D3ZBL5     | 7 | 1.7588 | 0.0485 |
| Ecm29 proteasome adaptor and scaffold                            | <i>Ecpas</i>  | F1M446     | 2 | 1.7725 | 0.0014 |
| Histidyl-tRNA synthetase 1                                       | <i>Hars</i>   | Q4QQV4     | 2 | 1.9933 | 0.0324 |

## 4 weeks p.i.

### Down-regulated proteins

|                                                |               |            |   |        |        |
|------------------------------------------------|---------------|------------|---|--------|--------|
| WD repeat domain 48                            | <i>Wdr48</i>  | D3Z8C7     | 4 | 0.4366 | 0.0167 |
| FH2 domain-containing protein                  | n.a.          | A0A0G2JZ27 | 2 | 0.4390 | 0.0075 |
| Translocase of inner mitochondrial membrane 21 | <i>Timm21</i> | Q5U2X7     | 2 | 0.5102 | 0.0209 |
| DIRAS family GTPase 1                          | <i>Diras1</i> | D4A304     | 2 | 0.5656 | 0.0310 |

|                                                       |                     |            |   |        |        |
|-------------------------------------------------------|---------------------|------------|---|--------|--------|
| Tubulin-folding cofactor B                            | <i>LOC103690005</i> | Q1RP74     | 2 | 0.5758 | 0.0501 |
| Cell adhesion molecule 1                              | <i>Cadm1</i>        | A0A5H1ZR04 | 6 | 0.6355 | 0.0443 |
| Rho GTPase activating protein 1                       | <i>Arhgap1</i>      | D4A6C5     | 6 | 0.7576 | 0.0017 |
| <b>Up-regulated proteins</b>                          |                     |            |   |        |        |
| Protein quaking-like                                  | <i>LOC108348175</i> | FILMH5     | 2 | 1.3592 | 0.0247 |
| Phosphatidylinositol-4,5-bisphosphate 4-phosphatase 1 | <i>Pip4p1</i>       | Q5PPM8     | 2 | 1.4036 | 0.0342 |
| UDP-glucose glycoprotein glucosyltransferase 1        | <i>Uggt1</i>        | Q9JLA3     | 9 | 1.4412 | 0.0395 |
| Pleckstrin and Sec7 domain containing 3               | <i>Hmgcl</i>        | P97519     | 2 | 1.5315 | 0.0219 |
| UFM1-specific peptidase 2                             | <i>Ufsp2</i>        | Q5XIB4     | 3 | 1.5412 | 0.0052 |
| Nipsnap homolog 3B                                    | <i>Nipsnap3b</i>    | Q5M949     | 4 | 1.7557 | 0.0201 |
| Nucleosome assembly protein 1-like 1                  | <i>Nap111</i>       | G3V6H9     | 3 | 2.1729 | 0.0472 |
| Solute carrier family 25 member 23                    | <i>Slc25a23</i>     | M0R4V4     | 2 | 2.2041 | 0.0402 |
| C2 calcium-dependent domain containing 4C             | <i>C2cd4c</i>       | D3ZLU0     | 2 | 2.2678 | 0.0492 |
| Leucine rich repeat containing 40                     | <i>Lrrc40</i>       | G3V7I7     | 2 | 2.3373 | 0.0393 |

---

### 16 weeks p.i.

---

|                                                          |                     |            |    |        |        |
|----------------------------------------------------------|---------------------|------------|----|--------|--------|
| <b>Down-regulated proteins</b>                           |                     |            |    |        |        |
| Regulator of G-protein signaling 12                      | <i>Rgs12</i>        | G3V9HI     | 2  | 0.3423 | 0.0413 |
| ATPase H+ transporting accessory protein 2               | <i>Atp6ap2</i>      | Q6AXS4     | 2  | 0.4141 | 0.0072 |
| DEXD-box helicase 39B                                    | <i>Ddx39b</i>       | Q63413     | 2  | 0.4820 | 0.0439 |
| Keratin 10                                               | <i>Krt10</i>        | Q61FW6     | 5  | 0.4894 | 0.0340 |
| Glutamate metabotropic receptor 3                        | <i>Grm3</i>         | P31422     | 2  | 0.5706 | 0.0477 |
| Glutamate ionotropic receptor kainate type subunit 2     | <i>Grik2</i>        | P42260     | 3  | 0.6270 | 0.0419 |
| ProSAAS                                                  | <i>LOC108348172</i> | G3V6X7     | 2  | 0.6508 | 0.0064 |
| Calmodulin 3                                             | <i>Calm3</i>        | P0DP31     | 6  | 0.6623 | 0.0124 |
| Elongator complex protein 1                              | <i>Elp1</i>         | F1LP76     | 5  | 0.6648 | 0.0048 |
| Potassium voltage-gated channel subfamily A member 1     | <i>Kcna1</i>        | P10499     | 2  | 0.6656 | 0.0350 |
| Isoleucyl-tRNA synthetase 1                              | <i>Iars</i>         | F1LS86     | 4  | 0.6681 | 0.0422 |
| BRICK1 subunit of SCAR/WAVE actin nucleating complex     | <i>Brk1</i>         | D3ZUP5     | 2  | 0.6930 | 0.0086 |
| Myelin basic protein                                     | <i>Mbp</i>          | P02688     | 4  | 0.6961 | 0.0014 |
| Similar to RIKEN cDNA 6430548M08                         | <i>RGD1304884</i>   | D4A3C2     | 4  | 0.7084 | 0.0024 |
| Phospholipase D family, member 3                         | <i>Pld3</i>         | Q5FVH2     | 4  | 0.7593 | 0.0255 |
| Neural cell adhesion molecule 2                          | <i>Ncam2</i>        | F1M8G9     | 10 | 0.7614 | 0.0483 |
| Protein kinase cAMP-activated catalytic subunit beta     | <i>Prkacb</i>       | P68182     | 2  | 0.7621 | 0.0024 |
| <b>Up-regulated proteins</b>                             |                     |            |    |        |        |
| Methylthioribose-1-phosphate isomerase 1                 | <i>Mri1</i>         | Q5HZE4     | 2  | 1.3251 | 0.0436 |
| Eukaryotic translation initiation factor 2 subunit gamma | <i>Eif2s3</i>       | P81795     | 2  | 1.3747 | 0.0441 |
| Heme binding protein 1                                   | <i>Hebp1</i>        | B4F7C7     | 3  | 1.3749 | 0.0422 |
| RIMS binding protein 2                                   | <i>Rimbp2</i>       | F1LSC8     | 2  | 1.4141 | 0.0463 |
| Annexin A7                                               | <i>Anxa7</i>        | Q61RJ7     | 8  | 1.4408 | 0.0484 |
| Actin related protein 10                                 | <i>Actr10</i>       | Q5M9F7     | 5  | 1.4751 | 0.0389 |
| Afadin, adherens junction formation factor               | <i>Afdn</i>         | O35889     | 2  | 1.4871 | 0.0385 |
| Microtubule affinity regulating kinase 2                 | <i>Mark2</i>        | A0A0G2K6X6 | 4  | 1.5633 | 0.0027 |
| Calpain, small subunit 1                                 | <i>Capns1</i>       | M0RD20     | 2  | 1.7931 | 0.0378 |
| Brain abundant, membrane attached signal protein 1       | <i>Baspl</i>        | Q05175     | 2  | 2.1073 | 0.0212 |
| Glutamyl-prolyl-tRNA synthetase                          | <i>Eprs</i>         | A0A0G2JZ12 | 7  | 2.2045 | 0.0161 |

n.a. Not available

**Supplementary Table 2. Synaptic ontology analysis of the functional biological processes**

| Ontology term                                                                   | Gene Count <sup>a</sup> | q-value  | Genes and corresponding time-points                                                                                                                                                        |
|---------------------------------------------------------------------------------|-------------------------|----------|--------------------------------------------------------------------------------------------------------------------------------------------------------------------------------------------|
| <b>Process in the synapse</b>                                                   | 18                      | 8.23E-05 | <b>1w p.i.:</b> SNCB, MAP2K1, INA, APP, FBXO2; <b>2w p.i.:</b> SNAP29, PRRT2, MYO5A, IQSEC2, PPP1R9A, NEFH, RHEB, PSD; <b>4w p.i.:</b> CADM1; <b>16w p.i.:</b> RIMBP2, GRIK2, KCNA1, MARK2 |
| <b>Process in the presynapse</b>                                                | 6                       | 0.0130   | <b>1w p.i.:</b> SNCB; <b>2w p.i.:</b> SNAP29, PRRT2; <b>16w p.i.:</b> GRIK2, KCNA1, RIMBP2                                                                                                 |
| Regulation cytosolic Ca <sup>2+</sup> levels                                    |                         |          |                                                                                                                                                                                            |
| Voltage-gated Ca <sup>2+</sup> channel activity                                 | 1                       | n.a.     | <b>16w p.i.:</b> RIMBP2                                                                                                                                                                    |
| Regulation of membrane potential                                                | 2                       | n.a.     | <b>16w p.i.:</b> GRIK2, KCNA1                                                                                                                                                              |
| Ligand-gated ion channel activity                                               | 1                       | n.a.     | <b>16w p.i.:</b> GRIK2                                                                                                                                                                     |
| Voltage-gated ion channel activity                                              | 1                       | n.a.     | <b>16w p.i.:</b> KCNA1                                                                                                                                                                     |
| Synaptic vesicle cycle                                                          | 4                       | 0.0313   | <b>1w p.i.:</b> SNCB; <b>2w p.i.:</b> SNAP29, PRRT2; <b>16w p.i.:</b> RIMBP2                                                                                                               |
| Regulation of synaptic vesicle cycle                                            | 1                       | n.a.     | <b>2w p.i.:</b> SNAP29                                                                                                                                                                     |
| Synaptic vesicle exocytosis                                                     | 3                       | 0.0184   | <b>2w p.i.:</b> SNAP29, PRRT2; <b>16w p.i.:</b> RIMBP2                                                                                                                                     |
| Regulation of Ca <sup>2+</sup> -dependent activation of synaptic vesicle fusion | 2                       | n.a.     | <b>2w p.i.:</b> PRRT2; <b>16w p.i.:</b> RIMBP2                                                                                                                                             |
| Regulation of synaptic vesicle exocytosis                                       | 1                       | n.a.     | <b>2w p.i.:</b> SNAP29                                                                                                                                                                     |
| Synaptic vesicle endocytosis                                                    | 1                       | n.a.     | <b>1w p.i.:</b> SNCB                                                                                                                                                                       |
| <b>Process in the postsynapse</b>                                               | 5                       | 0.0139   | <b>1w p.i.:</b> MAP2K1; <b>2w p.i.:</b> MYO5A, IQSEC2; <b>16w p.i.:</b> GRIK2, KCNA1                                                                                                       |
| Regulation of cytosolic Ca <sup>2+</sup> levels                                 | 1                       | n.a.     | <b>2w p.i.:</b> MYO5A                                                                                                                                                                      |
| Regulation of membrane potential                                                | 2                       | n.a.     | <b>16w p.i.:</b> GRIK2, KCNA1                                                                                                                                                              |
| Transmitter-gated ion channel activity                                          | 1                       | n.a.     | <b>16w p.i.:</b> GRIK2                                                                                                                                                                     |
| Voltage-gated ion channel activity                                              | 1                       | n.a.     | <b>16w p.i.:</b> KCNA1                                                                                                                                                                     |
| Regulation of membrane neurotransmitter receptor levels                         | 2                       | n.a.     | <b>1w p.i.:</b> MAP2K1; <b>2w p.i.:</b> IQSEC2                                                                                                                                             |
| <b>Synaptic signaling</b>                                                       |                         |          |                                                                                                                                                                                            |
| Trans-synaptic signaling                                                        | 5                       | 0.0130   | <b>1w p.i.:</b> INA; <b>2w p.i.:</b> IQSEC2, PPP1R9A, NEFH; <b>4w p.i.:</b> CADM1                                                                                                          |
| Retrograde signaling by trans-synaptic protein complex                          | 1                       | n.a.     | <b>4w p.i.:</b> CADM1                                                                                                                                                                      |
| Chemical synaptic transmission                                                  | 4                       | 0.0208   | <b>1w p.i.:</b> INA; <b>2w p.i.:</b> IQSEC2, PPP1R9A, NEFH                                                                                                                                 |
| Modulation of chemical synaptic transmission                                    | 2                       | n.a.     | <b>2w p.i.:</b> IQSEC2, PPP1R9A                                                                                                                                                            |
| Postsynaptic modulation of chemical synaptic transmission                       | 2                       | n.a.     | <b>1w p.i.:</b> INA; <b>2w p.i.:</b> NEFH                                                                                                                                                  |
| <b>Synapse organization</b>                                                     | 9                       | 8.23E-04 | <b>1w p.i.:</b> INA, APP; <b>2w p.i.:</b> RHEB, NEFH, PSD, PPP1R9A; <b>4w p.i.:</b> CADM1; <b>16w p.i.:</b> MARK2, RIMBP2                                                                  |
| Postsynapse organization                                                        | 2                       | n.a.     | <b>2w p.i.:</b> RHEB; <b>16w p.i.:</b> MARK2                                                                                                                                               |
| Structural constituent of synapse                                               | 3                       | 6.13E-03 | <b>1w p.i.:</b> INA; <b>2w p.i.:</b> NEFH; <b>16w p.i.:</b> RIMBP2                                                                                                                         |
| Presynapse. Active zone                                                         | 1                       | n.a.     | <b>16w p.i.:</b> RIMBP2                                                                                                                                                                    |
| Postsynapse. Postsynaptic intermediate filament cytoskeleton                    | 2                       | n.a.     | <b>1w p.i.:</b> INA; <b>2w p.i.:</b> NEFH                                                                                                                                                  |

|                                                                  |   |        |                                                                 |
|------------------------------------------------------------------|---|--------|-----------------------------------------------------------------|
| Synapse adhesion between pre- and post-synapse                   | 1 | n.a.   | <b>4w p.i.:</b> CADM1                                           |
| Synapse assembly                                                 | 3 | 0.0251 | <b>1w p.i.:</b> APP; <b>2w p.i.:</b> PSD; <b>4w p.i.:</b> CADM1 |
| Presynapse assembly                                              | 1 | n.a.   | <b>4w p.i.:</b> CADM1                                           |
| Regulation of synapse assembly                                   | 2 | n.a.   | <b>1w p.i.:</b> APP; <b>2w p.i.:</b> PSD                        |
| Regulation of presynapse assembly                                | 1 | n.a.   | <b>1w p.i.:</b> APP                                             |
| Postsynaptic specialization assembly                             | 1 | n.a.   | <b>2w p.i.:</b> PSD                                             |
| Maintenance of synapse structure. Postsynapse                    | 1 | n.a.   | <b>4w p.i.:</b> CADM1                                           |
| Postsynaptic cytoskeleton organization. Actin cytoskeleton       | 1 | n.a.   | <b>2w p.i.:</b> PPP1R9A                                         |
| <b>Metabolism</b>                                                |   |        |                                                                 |
| Regulation of catabolic process modulating synaptic transmission |   | n.a.   |                                                                 |
| Postsynapse                                                      | 1 |        | <b>1w p.i.:</b> FBXO2                                           |
| <b>Transport</b>                                                 |   | n.a.   |                                                                 |
| Establishment of ER localization to postsynapse                  | 1 |        | <b>2w p.i.:</b> MYO5A                                           |

---

<sup>a</sup>The gene count column shows the number of proteins that are annotated in SynGO against each term  
n.a. not available



**Supplementary Table 3. Synaptic ontology analysis of the structural cellular components**

| Ontology term                                   | Gene Count <sup>a</sup> | q-value  | Genes and corresponding time-points                                                                                                                                                                                          |
|-------------------------------------------------|-------------------------|----------|------------------------------------------------------------------------------------------------------------------------------------------------------------------------------------------------------------------------------|
| <b>Synapse</b>                                  | 23                      | 2.03E-06 | <b>1w p.i.:</b> EIF3B, BCAS1, RAB6B, SNCB, NEFM, APP, INA, MAP2K1, FBXO2; <b>2w p.i.:</b> PPP1R9A, IQSEC2, VPS33B, SNAP29, PRRT2, MYO5A, NEFH, RHEB, PSD; <b>4w p.i.:</b> CADM1; <b>16w p.i.:</b> RIMBP2, KCNA1, GRM3, MARK2 |
| <b>Presynapse</b>                               | 13                      | 7.78E-05 | <b>1w p.i.:</b> RAB6B, SNCB, NEFM, APP; <b>2w p.i.:</b> PPP1R9A, IQSEC2, VPS33B, SNAP29, PRRT2; <b>4w p.i.:</b> CADM1; <b>16w p.i.:</b> RIMBP2, KCNA1, GRM3                                                                  |
| Presynaptic cytosol                             | 1                       | n.a.     | <b>1w p.i.:</b> SNCB                                                                                                                                                                                                         |
| Presynaptic cytoskeleton                        |                         |          |                                                                                                                                                                                                                              |
| Presynaptic intermediate filament cytoskeleton  | 1                       | n.a.     | <b>1w p.i.:</b> NEFM                                                                                                                                                                                                         |
| Presynaptic active zone                         | 3                       | 0.0256   | <b>1w p.i.:</b> APP; <b>2w p.i.:</b> IQSEC2; <b>16w p.i.:</b> RIMBP2                                                                                                                                                         |
| Presynaptic active zone cytoplasmic component   | 2                       | n.a.     | <b>2w p.i.:</b> IQSEC2; <b>16w p.i.:</b> RIMBP2                                                                                                                                                                              |
| Synaptic vesicle                                | 2                       | n.a.     | <b>2w p.i.:</b> VPS33B;SNAP29                                                                                                                                                                                                |
| Synaptic vesicle membrane, extrinsic component  | 1                       | n.a.     | <b>2w p.i.:</b> SNAP29                                                                                                                                                                                                       |
| Presynaptic membrane                            |                         |          |                                                                                                                                                                                                                              |
| Integral component of presynaptic membrane      | 4                       | 0.0101   | <b>2w p.i.:</b> PRRT2; <b>4w p.i.:</b> CADM1; <b>16w p.i.:</b> KCNA1, GRM3                                                                                                                                                   |
| <b>Postsynapse</b>                              | 14                      | 1.30E-04 | <b>1w p.i.:</b> INA, NEFM, MAP2K1, FBXO2; <b>2w p.i.:</b> MYO5A, NEFH, PPP1R9A, RHEB, IQSEC2, PSD; <b>4w p.i.:</b> CADM1; <b>16w p.i.:</b> RIMBP2, KCNA1, GRM3                                                               |
| Postsynaptic cytoskeleton                       | 5                       | 4.24E-06 | <b>1w p.i.:</b> INA, NEFM; <b>2w p.i.:</b> NEFH, MYO5A, PPP1R9A                                                                                                                                                              |
| Postsynaptic intermediate filament cytoskeleton | 3                       | 2.19E-05 | <b>1w p.i.:</b> INA, NEFM; <b>2w p.i.:</b> NEFH                                                                                                                                                                              |
| Postsynaptic actin cytoskeleton                 | 2                       | n.a.     | <b>2w p.i.:</b> MYO5A, PPP1R9A                                                                                                                                                                                               |
| Postsynaptic specialization                     |                         |          |                                                                                                                                                                                                                              |
| Postsynaptic density                            | 6                       | 0.0098   | <b>1w p.i.:</b> MAP2K1, INA; <b>2w p.i.:</b> PPP1R9A, RHEB, IQSEC2, PSD                                                                                                                                                      |
| Postsynaptic density intracellular component    | 3                       | 0.0049   | <b>1w p.i.:</b> INA; <b>2w p.i.:</b> IQSEC2, PSD                                                                                                                                                                             |
| Postsynaptic density membrane                   | 1                       | n.a.     | <b>2w p.i.:</b> IQSEC2                                                                                                                                                                                                       |
| Postsynaptic membrane                           | 4                       | 0.0098   | <b>1w p.i.:</b> FBXO2; <b>4w p.i.:</b> CADM1; <b>16w p.i.:</b> KCNA1, GRM3                                                                                                                                                   |
| Extrinsic component of postsynaptic membrane    | 1                       | n.a.     | <b>1w p.i.:</b> FBXO2                                                                                                                                                                                                        |
| Integral component of postsynaptic membrane     | 3                       | 0.0275   | <b>4w p.i.:</b> CADM1; <b>16w p.i.:</b> KCNA1, GRM3                                                                                                                                                                          |
| Postsynaptic ER                                 |                         |          |                                                                                                                                                                                                                              |
| Postsynaptic SER                                | 1                       | n.a.     | <b>2w p.i.:</b> MYO5A                                                                                                                                                                                                        |

<sup>a</sup>The gene count column shows the number of proteins that are annotated in SynGO against each term

**Supplementary Table 4. Primary antibodies used for immunohistochemistry, immunofluorescence and flow cytometry**

| Antigen | Host species | Species reactivity <sup>a</sup> | Clone                | Isotype | Dilution               | Reference                          |
|---------|--------------|---------------------------------|----------------------|---------|------------------------|------------------------------------|
| α-syn   | Mouse        | H                               | Monoclonal (LB509)   | IgG1k   | IHC 1:500<br>IF 1:1000 | Invitrogen, #180215                |
| GABA    | Rabbit       | H, M, R                         | Polyclonal           | IgG     | IF 1:3000              | GeneTex, #GTX125988                |
| GluA1   | Rabbit       | M, R                            | Monoclonal (D4N9V)   | IgG     | FC 1:1500              | Cell Signaling Technology, #13185S |
| Nrx1β   | Mouse        | H, M, R                         | Monoclonal (N170A/1) | IgG1    | FC 1:400               | NeuroMab, #75-216                  |
| TH      | Mouse        | R                               | Monoclonal (2/40/15) | IgG2a   | IHC 1:1000             | Millipore, #MAB5280                |
| TH      | Rabbit       | H, M, R                         | Polyclonal           | IgG     | IF 1:1000              | Merck, #AB152                      |
| vGlut2  | Guinea pig   | M, R                            | Polyclonal           | IgG     | IF 1:500               | Synaptic Systems, #135-404         |

<sup>a</sup>We only show the following species: H, human; M, mouse; R, rat.  
Abbreviations: FC, flow cytometry; IF, immunofluorescence; IHC, immunohistochemistry.

**Supplementary Table 5. Secondary antibodies used for immunohistochemistry, immunofluorescence and flow cytometry**

| Target     | Host species | Conjugate            | Isotype | Dilution                        | Reference                            |
|------------|--------------|----------------------|---------|---------------------------------|--------------------------------------|
| Mouse      | Horse        | Biotinylated         | IgG     | IHC α-syn 1:300<br>IHC TH 1:500 | Vector Laboratories, #BA2000         |
| Guinea pig | Goat         | Alexa Fluor 594      | IgG     | IF 1:1000                       | Invitrogen, #A11076                  |
| Mouse      | Donkey       | Alexa Fluor 546      | IgG     | IF 1:1000                       | Invitrogen, #A10036                  |
| Mouse      | Donkey       | Alexa Fluor 647      | IgG     | IF 1:1000                       | Invitrogen, #A31571                  |
| Mouse      | Goat         | Alexa Fluor 647      | IgG     | FC 1:800                        | Invitrogen, #A21240                  |
| Rabbit     | Goat         | Alexa Fluor 488      | IgG     | IF 1:1000                       | Invitrogen, #A11034                  |
| Rabbit     | Goat         | Brilliant Violet 421 | IgG     | FC 1:400                        | Jackson ImmunoResearch, #111-675-144 |

Abbreviations: FC, flow cytometry; IF, immunofluorescence; IHC, immunohistochemistry.

# Supplementary Materials and Methods

## Immunohistochemistry and immunofluorescence

### Immunohistochemistry

Immunohistochemistry was performed on sections containing the SNpc/VTA and the hippocampus to evaluate  $\alpha$ -syn expression, or the SNpc/VTA to evaluate tyrosine hydroxylase (TH) expression. Briefly, sections were washed in PBS and endogenous peroxidase activity was quenched with 3% H<sub>2</sub>O<sub>2</sub> in PBS for 10 min at room temperature (RT). After several washing steps, sections were blocked with normal horse serum (NHS, 10% and 4% for  $\alpha$ -syn and TH, respectively) and permeabilized for 1 h at RT with Triton X-100 in PBS (PBS-T, 0.2% and 0.3% for  $\alpha$ -syn and TH, respectively). The sections were then incubated overnight with their corresponding primary antibodies (Supplementary Table 4) at either 4°C for  $\alpha$ -syn or RT for TH. After washing in PBS, the sections were incubated with a biotinylated secondary antibody (Supplementary Table 5) for 1 h at RT followed by an avidin-biotin-peroxidase complex (1:100, Vectastain ABC kit, Vector Laboratories, #PK4000) for 1 h at RT. Finally, the signal was visualized with a 0.05% 3,3'-diaminobenzidine tetrahydrochloride (DAB; Sigma-Aldrich, #D5905)/H<sub>2</sub>O<sub>2</sub> solution. All stained sections were mounted on glass superfrost slides, air-dried overnight, dehydrated in ascending alcohols, cleared in xylene, and coverslipped with the mounting medium (DPX: Panreac, #255254.1610).

### Relative optical density quantification of $\alpha$ -syn immunoreactivity

The extent of  $\alpha$ -syn expression in the SNpc/VTA and hippocampus was quantified as the relative optical density (ROD). For each animal and time point, 3 representative sections of the SNpc/VTA (approx. anteroposterior: -5.30 mm, -5.60 mm, and -6.00 mm from Bregma according to the stereotaxic atlas)<sup>1</sup> and hippocampus (approx. anteroposterior: -3.30 mm, -3.80 mm, and -4.16 mm from Bregma according to the stereotaxic atlas)<sup>1</sup> were analyzed. Images were acquired with an Aperio CS2 digital pathology slide scanner (Leica Biosystems) and the ROD values were obtained for the selected brain areas using ImageJ software (NIH) after converting the images to 8-bit greyscale images. The grey level ROD for  $\alpha$ -syn immunoreactivity was calculated as:

$ROD = \log(\text{basal grey signal}/\text{signal grey level})^{2,3}$ . The mean ROD values were averaged across all animals for each group and time point.

### **Stereological quantification of TH<sup>+</sup> cells**

The number of TH<sup>+</sup> immunolabeled neurons was determined by stereology in regularly spaced, 50  $\mu\text{m}$  thick sections that span the entire SNpc and VTA. The sections were examined on an Olympus Bx61 motorized microscope (Olympus) equipped with a DP71 digital camera (Olympus) that was connected to an XYZ stepper (H101BX, PRIOR), driven by CAST Visiopharm software (Visiopharm). The optical fractionator method was employed, using an interactive test grid controlled by the software as described previously.<sup>4,5</sup> A total of 7 sections per animal were quantified, covering the entire rostrocaudal extent of the SNpc and VTA (approx. anteroposterior: between -4.30 mm and -6.72 mm from Bregma according to the stereotaxic atlas).<sup>1</sup> TH<sup>+</sup> cell bodies inside the counting frame or touching the inclusion lines were quantified. These parameters were set to reach an error coefficient below 0.10 (Gundersen, m=0) and 0.05 (Gundersen, m=1). Bilateral estimations of the TH<sup>+</sup> cell populations for the SNpc and VTA were averaged across all animals for each group and time point.

### **Immunofluorescence**

Triple immunofluorescence staining was performed on coronal free-floating sections containing the VTA to confirm the presence of  $\alpha$ -syn in dopaminergic (TH<sup>+</sup>) and glutamatergic (vGlut2<sup>+</sup>) neurons. Double immunofluorescent staining was also performed on coronal free-floating sections containing the hippocampus to define the dopaminergic (TH<sup>+</sup>), glutamatergic (vGlut2<sup>+</sup>), or GABAergic (GABA<sup>+</sup>) nature of the  $\alpha$ -syn<sup>+</sup> fibers in the hippocampus. Briefly, sections were washed in PBS and then permeabilized for 10 min at RT in 0.3% PBS-T. After blocking with 10% normal goat serum (NGS) for 1 h at RT, the sections were probed overnight at 4°C with the corresponding primary antibodies (Supplementary Table 4) diluted in PBS. After washing with PBS, the sections were then incubated for 1 h at RT with their corresponding secondary fluorescent antibodies (Supplementary Table 5). The cell nuclei were finally counterstained for 15 min at RT with 4',6-diamidino-2-phenylindol (DAPI, 1:10,000; Invitrogen, #D1306) diluted in PBS and after washing with PBS, they were mounted on glass superfrost slides, air-dried overnight and coverslipped with Vectashield mounting medium (Vector Laboratories, # H-1400).

## **Confocal microscopy**

Fluorescent images were acquired with a Zeiss LSM 800 laser scanning confocal microscope (Zeiss) with a Plan-Apochromat 63x/1.4 numerical aperture oil-immersion objective. Fluorescence was visualized by combining laser sets for the triple immunofluorescence of the VTA ( $\lambda = 405\text{-}488\text{-}561\text{-}633$  nm) and for the double immunofluorescences of the hippocampus ( $\lambda = 405\text{-}488\text{-}561$  nm). Image acquisition parameters were optimized for each marker. Images of the VTA (approx. anteroposterior: -5.30 mm from Bregma according to the stereotaxic atlas)<sup>1</sup> and dorsal hippocampus (approx. anteroposterior: -3.80 mm from Bregma according to the stereotaxic atlas)<sup>1</sup> were acquired using ZEN Imaging Software (Zeiss). The image size was 1024 x 1024 pixels with a field of view of 101.41 x 101.41  $\mu\text{m}$ .

## **Quantitative proteomics by SWATH-MS and bioinformatics analysis**

### **Synaptosome preparation and protein digestion**

The hippocampus was rapidly dissected out and homogenized in a sucrose buffer (pH 7.4): 320 mM sucrose, 10 mM HEPES, 1 mM  $\text{MgCl}_2$ , 1 mM EGTA, protease inhibitors (1:1000; Sigma-Aldrich, #P8340) and phosphatase inhibitors (1:100; Thermo Fisher Scientific, #78420). The samples were centrifuged at 1,400 x g for 10 min at 4°C to obtain the supernatant (S1) containing the cytoplasm and membranous structures. To maximize sample recovery, the pellet (P1) was resuspended and centrifuged again at 800 x g for 10 min at 4°C and the S1' and S1 supernatants were mixed, while the P1' pellet was discarded. The S1/S1' mixture was centrifuged at 11,600 x g for 12 min at 4°C, and the supernatant S2, containing the cytoplasm, was discarded and the P2 pellet, enriched in synaptosomes was resuspended in sucrose buffer. To purify the synaptosomes, resuspended samples were added on top of the same volume of a high [glucose] solution (1.4 M sucrose, 10 mM HEPES [pH 7.4] and phenol red), and centrifuged at 20,000 x g for 1 h at 4°C to create a sucrose gradient. After centrifugation, the interphase where the synaptosomes concentrated was collected and the samples were sonicated for 10 s at medium power (Sonopuls HD2070 Bandelin), homogenized in lysis buffer (7 M urea, 2 M thiourea, and 50 mM DTT), centrifuged at 100,000 x g for 1 h at 15 °C and the protein concentration was measured with a Bradford assay (Bio-Rad). A pool of all the samples

was used as input to generate the sequential window acquisition of all theoretical mass spectra–mass spectrometry (SWATH-MS) assay library. To enhance the proteome coverage, synaptosomes were digested in-gel, and the protein extracts (30 µg) were diluted in Laemmli sample buffer and loaded into a 0.75 mm thick polyacrylamide gel with a 4% stacking gel cast over a 12.5% resolving gel. The total gel was stained with Coomassie Brilliant Blue and 12 equal slices from the pooled sample were collected from the gel. Protein enzymatic cleavage was carried out at 37 °C for 16 h with trypsin (1:20, w/w; Promega) as described previously.<sup>6</sup> Peptide purification and concentration was performed using C18 Zip Tip Solid Phase Extraction (Millipore), and the peptides recovered from in-gel digestion were reconstituted at a final concentration of 0.5 µg/µl in MS buffer (2% acetonitrile -ACN-, and 0.5% formic acid -FA- diluted in MilliQ-water) prior to MS analysis.

### **LC-MS/MS analysis to generate the spectral library**

The MS/MS datasets to generate the spectral library were acquired on a TripleTOF 5600+ mass spectrometer (Sciex) associated with an Eksigent nanoLC ultra 2D pump system (Sciex) and fitted with a 75 µm ID column (0.075 × 250 mm, particle size 3 µm and pore size 100 Å; Thermo Scientific). Before separation, the peptides were concentrated on a C18 precolumn (0.1 × 50 mm, particle size 5 µm and pore size 100 Å; Thermo Scientific). The mobile phases were 0.1% FA in water (buffer A) and 0.1% FA in ACN (buffer B). Peptides were eluted in a linear gradient of buffer B from 2% to 40% over 120 min. The column was equilibrated in 95% buffer B for 10 min and 2% buffer B for 10 min. During all processes, the precolumn was in line with the column and the flow was maintained at 300 nl/min all along the gradient. The output of the separation column was directly coupled to the nano-electrospray source and the MS1 spectra were collected in the range of 350-1250 m/z for 250 ms. The 35 most intense precursors with charge states of 2 to 5 that exceeded 150 counts per second were selected for fragmentation using rolling collision energy. MS2 spectra were collected in the range of 230–1500 m/z for 100 ms and the precursor ions were dynamically excluded from reselection for 15 s.

### **Database search and results processing of the assay library**

MS/MS data acquisition was performed using AnalystTF 1.7 (Sciex) and spectra files were processed with the ProteinPilot v5.0 search engine (Sciex) using the ParagonTM

Algorithm (v.4.0.0.0)<sup>7</sup> for the database search. To avoid using the same spectral evidence for more than one protein, the proteins were grouped based on MS/MS spectra using the Progroup™ Algorithm, regardless of the peptide sequence assigned. A false discovery rate (FDR) was employed using a non-linear fitting method<sup>8</sup> and the results displayed were those reporting a 1% Global FDR or better.

## **SWATH-MS**

Individual protein extracts (20 µg) from all experimental groups were subjected to in-gel digestion, peptide purification and reconstitution before MS analysis, as described previously. For SWATH-MS-based experiments, the TripleTOF 5600+ instrument was configured as defined elsewhere<sup>9</sup>, and using an isolation width of 16 Da (15 Da of optimal ion transmission efficiency and 1 Da for the window overlap), and a set of 37 overlapping windows was constructed covering the mass range 450–1000 Da. In this way, 2 µl of each sample was loaded onto a trap column (0.1 × 50 mm, particle size 5 µm and pore size 100 Å; Thermo Scientific) and desalted with 0.1% trifluoroacetic acid (TFA) at 2 µl/min for 10 min. The peptides were loaded onto an analytical column equilibrated in MS buffer (0.075 × 250 mm, particle size 3 µm and pore size 100 Å; Thermo Scientific) and peptides were eluted with a linear gradient of buffer B as described previously, infusing them onto the mass spectrometer. The Triple TOF was operated in swath mode, performing a 0.050 s TOF MS scan from 350 to 1250 m/z, followed by 0.080 s product ion scans from 230 to 1800 m/z on the 37 defined windows (3.05 s/cycle). The collision energy was set to an optimum energy for a 2+ ion at the center of each SWATH block, with a 15 eV collision energy spread.

## **Label-free quantitative data analysis**

The resulting ProteinPilot group file from the library generated was loaded into PeakView® software (v2.1, Sciex) and peaks from the SWATH runs were extracted with a peptide threshold of 99% confidence (Unused Score ≥1.3) and a FDR <1%. As such, the MS/MS spectra of the assigned peptides were extracted by ProteinPilot and only the proteins that fulfilled the following criteria were validated: (1) peptide mass tolerance lower than 10 ppm, (2) 99% confidence in peptide identification, and (3) complete b/y ions series found in the MS/MS spectrum. Only proteins quantified with at least two unique peptides were considered.

## **Bioinformatics analysis**

The significantly enriched structural complexes and biological processes from the proteins deregulated in the synaptosomal fractions were identified using Metascape.<sup>10</sup> For the generation of the different heatmaps, after the identification of all statistically enriched terms (structural complex, GO/KEGG terms; biological process, GO/KEGG terms, canonical pathways, hallmark gene sets), cumulative hypergeometric p-values and enrichment factors were calculated and used for filtering. The remaining significant terms were then hierarchically clustered into a tree based on Kappa-statistical similarities among their gene members. A 0.3 kappa score was then applied as the threshold to cast the tree into term clusters. The term with the best p-value within each cluster was selected as its representative term and displayed in a dendrogram. The heat map cells are colored by their p-values and grey cells indicate the lack of enrichment for that term in the corresponding list. The interactomes of human and rat  $\alpha$ -syn were obtained from the curated Biological General Repository for Interaction Datasets (BioGRID: <https://thebiogrid.org/>).<sup>11</sup> The synaptic ontology analysis was performed using the SynGo platform (<https://syngoportal.org/>).<sup>12</sup> The “brain expressed” background set was selected, containing 18,035 unique genes in total, of which 1104 overlap with SynGO annotated genes. For each ontology term, a one-sided Fisher exact test was performed to compare differential datasets and the “brain expressed” background set, a result shown in the “p-value” column. To find enriched terms within the entire SynGO ontology, a multiple testing correction using the FDR was applied (q-value column).

## **Fluorescence analysis of single-synapse LTP (FASS-LTP)**

### **Synaptosome isolation**

The hippocampus was dissected out rapidly and homogenized on ice in a sucrose buffer (pH 7.4): 320 mM sucrose, 10 mM HEPES, protease inhibitors (1:1000; Sigma-Aldrich, #P8340) and phosphatase inhibitors (1:100; Thermo Fisher Scientific, #78420). The samples were centrifuged at 1,200 x g for 20 min at 4°C to obtain the S1 supernatant containing the cytoplasm and membranous structures, which was again centrifuged at 12,000 x g for 20 min at 4°C to obtain the S2 supernatant containing the cytoplasm and the P2 pellet enriched in synaptosomes. The S2 supernatant was discarded and P2 pellet



was resuspended in either extracellular buffer (120 mM NaCl, 3 mM KCl, 2 mM CaCl<sub>2</sub>, 2 mM MgCl<sub>2</sub>, 15 mM glucose, and 15 mM HEPES [pH 7.4]) or cLTP buffer (125 mM NaCl, 5 mM KCl, 2 mM CaCl<sub>2</sub>, 30 mM glucose, and 10 mM HEPES [pH 7.4]). Synaptosomes in either the extracellular or cLTP buffer were incubated in a cell culture dish (30 mm) for 10-15 min at RT and transferred to flow cytometry tubes (180 µL containing 30-75 µg of synaptosomes/tube). An aliquot of each sample was used to determine the protein concentration using the BCA Assay (Thermo Fisher Scientific, #23227).

### **Incubation with dopaminergic drugs**

Fresh stock solutions (100X) of the dopaminergic drugs PPX (1 mM; Sigma-Aldrich, #A1237) and L-DOPA (3 mM; Sigma-Aldrich, #D1507-5G) were prepared in distilled water. After P2 synaptosome isolation, 2 µL of each drug was added to the synaptosomes in both the extracellular and cLTP buffers (final [PPX] = 10 µM and [L-DOPA] = 30 µM). As a control, 2 µL of distilled water (vehicle) was added to the synaptosomes in both the extracellular and cLTP buffers. All the samples were incubated for 10 min at 37°C.

### **Stimulation of cLTP**

To prime NMDARs, a glycine solution (5 mM glycine, 0.01 mM strychnine and 0.2 mM bicuculline methiodide, diluted in cLTP buffer) was added to the synaptosomes in cLTP buffer. As a control, the same volume of extracellular buffer was added to the synaptosomes in extracellular buffer. All samples were incubated for 15 min at 37°C and the synaptosomes were then depolarized by adding a high [KCl] solution (50 mM NaCl, 100 mM KCl, 2 mM CaCl<sub>2</sub>, 30 mM glucose, 0.5 mM glycine, 10 mM HEPES, 0.001 mM strychnine and 0.02 mM bicuculline methiodide [pH 7.4]) to the synaptosomes in cLTP buffer. As a control, the same volume of extracellular buffer was added to the synaptosomes in extracellular buffer, again incubating all the samples for 30 min at 37°C. Stimulation was stopped by adding ice-cold EDTA (0.1 mM in PBS) and blocking the samples with 5% fetal bovine serum (FBS, Gibco, #10500-064) in PBS. The tubes were chilled on ice, immediately centrifuged at 2,500 x g for 10 min at 4°C and the supernatant was discarded, while the pellet was resuspended with gentle agitation on ice.

### **Fluorescent staining of synaptosomes**

After blocking, the resuspended synaptosomes were probed for 30 min at 4 °C with primary antibodies against GluA1 and Nr1 $\beta$  (Supplementary Table 4), and Calcein AM (100 nM, eBioscience™, #65-0853-39). The samples were then washed with ice-cold 5% FBS and centrifuged at 2,500 x g for 10 min at 4°C. The supernatant was discarded, and the synaptosomes were resuspended and incubated for 30 min at 4°C with the corresponding secondary antibodies conjugated to Brilliant Violet 421 or Alexa Fluor 647 (Supplementary Table 5), respectively, and Calcein AM (100 nM) in the dark. After one last washing step with ice-cold PBS, the synaptosomes were resuspended in PBS and stored protected from light at 4°C until they were analyzed by flow cytometry.

### **Isolation and fluorescent labelling of mitochondria and nuclei (size-standards)**

The mitochondria and nuclei isolated from rat liver were used as biological size-standards to identify synaptosomes by flow cytometry. To isolate mitochondria, rat livers were homogenized in sucrose buffer (pH 7.4): 200 mM sucrose, 10 mM Tris, 1 mM EGTA and protease inhibitor cocktail (1:1,000). The samples were centrifuged at 600 x g for 10 min at 4°C and the S1 supernatant containing the cytoplasm was collected and centrifuged again at 7,000 x g for 10 min at 4°C to obtain the P2 pellet containing membranous structures. This P2 pellet was resuspended in ice-cold sucrose buffer and centrifuged again at 7,000 x g for 10 min at 4°C to obtain the P3 pellet containing isolated mitochondria.<sup>13</sup>

To isolate nuclei, rat livers were homogenized in sucrose buffer (pH 7.4): 250 mM sucrose, 5 mM MgCl<sub>2</sub> and 10 mM Tris. The samples were centrifuged at 600 x g for 10 min at 4°C and the S1 supernatant containing the cytoplasm was discarded, and the P1 pellet was resuspended in ice-cold sucrose buffer and centrifuged again at 600 x g for 10 min at 4°C to obtain the P2 pellet containing the crude nuclei. The samples were resuspended in ice-cold high-concentration sucrose buffer (2 M sucrose, 1 mM MgCl<sub>2</sub> and 10 mM Tris [pH 7.4]) and centrifuged at 16,000 x g for 30 min at 4°C to obtain the P3 pellet containing isolated nuclei.<sup>14</sup>

For staining, isolated mitochondria and nuclei (150-200  $\mu$ g) were brought to a physiological temperature, transferred to flow cytometry tubes and incubated with Mitotracker Red CMXRos (25 nM; Invitrogen, #M7512) for 30 min at 37 °C, or with

DAPI (1:10,000; Invitrogen, #D1306) for 10 min at RT, respectively. Samples were stored protected from light at 4°C until they were analyzed by flow cytometry.

### **Flow cytometry**

Samples were acquired using a FACSCanto II System (BD Biosciences) equipped with a 405 nm solid state diode violet laser, a 488 nm solid state blue laser and a 633 nm helium-neon red laser. Relative size and granularity were determined by forward scatter (FSC) and side scatter (SSC) properties, respectively, and the fluorescence was detected with the photomultiplier tubes (PMTs) using bandpass (BPF) and long-pass filters (LPF): Brilliant Violet 421 and DAPI PMT1 (BPF 450±50 nm); Calcein AM PMT2 (BPF 530±30 nm; LPF 502); Mitotracker Red CMXRos PMT3 (BPF 585±42 nm; LPF 556); and Alexa Fluor 647 PMT4 (BPF 660±20 nm). The FSC, SSC, and fluorescent signals were collected using logarithmic amplification. Small fragments and debris were excluded by establishing an FSC threshold (gain = 500), and a total of 50,000 size-gated particles were collected and analyzed for each sample (event rate: ~500/s).

The flow cytometry data was analyzed using FlowJo software (v10; FlowJo, LLC). First, considering the FSC and SSC parameters, synaptosomes (~0.75 to 3 µm) were selected using isolated mitochondria (~0.5 µm) and nuclei (~8 µm) as biological size standards (Supplementary Fig. 3A-C). Next, based on the FSC-H (height) and FSC-A (area) parameters, doublets and large aggregates were excluded, selecting single events (Supplementary Fig. 3D). Fluorescence gates were set based on standard immunostaining controls. The Calcein AM<sup>+</sup> population was selected (Supplementary Fig. 3F) and finally, individual GluA1 and Nr1β positive populations were selected, and the “Make and Gate” Boolean analysis tool was used to evaluate the double-positive population. For a visual representation, GluA1 and Nr1β staining was plotted on the same graph with a quad gate. The GluA1/Nr1β double-positive events in stimulated samples were normalized to those in unstimulated basal samples to obtain the cLTP (%). To compare within different experiments, the GluA1/Nr1β double-positive levels were normalized to those of the AAV-EVV basal state incubated with the vehicle in each experiment. An increase in the GluA1/Nr1β double-positive population in cLTP samples was compared to the basal condition, considered indicative of cLTP.

## Western blotting

We confirmed the expression of  $\alpha$ -syn in the midbrain of the animals used for behavioral studies and FASS-LTP experiments in western blots (Supplementary Fig. 3G). The midbrain was dissected out along with the hippocampus, immediately frozen on dry ice and stored at  $-80^{\circ}\text{C}$ . The midbrain was slowly defrosted, homogenized in 2% SDS buffer (10 mM Tris [pH 7.4], 2% SDS, protease inhibitor cocktail [1:1000] and phosphatase inhibitor cocktail [1:100]) and sonicated for 2 min. After 20 min on ice, the homogenates were centrifuged at  $4^{\circ}\text{C}$  (15,900 x g for 13 min), and the supernatant was collected and stored at  $-80^{\circ}\text{C}$ . The protein concentration was measured using the BCA protein assay (Thermo Fisher Scientific, #23227), and the midbrain samples (18  $\mu\text{g}$ ) were mixed with 4X loading buffer (1.25 M Tris [pH 6.8], 40% glycerol, 8% SDS, 0.04% bromophenol blue and 5% 2-mercaptoethanol) and lysis buffer (25 mM HEPES [pH 7.4], 150 mM NaCl, 1% Triton X-100 and 5 mM EDTA), and denatured at  $95^{\circ}\text{C}$  for 10 min. The proteins were resolved in 4-15% Mini-PROTEAN®TGX Stain-Free™ Protein Gels (Bio-Rad, #4568083) and transferred to PVDF membranes using the Trans-Blot Turbo RTA Mini PVDF Transfer Kit (Bio-Rad, #1704272). The membrane was cut and the lower part that corresponded to the  $\alpha$ -syn molecular weight was fixed in 4% paraformaldehyde for 30 min. After several washing steps in TBS with 0.1 % Tween-20, the lower and upper membrane pieces were blocked with 5% skimmed milk before incubating them overnight at  $4^{\circ}\text{C}$  with the corresponding anti- $\alpha$ -syn primary antibody (1:1,000; Invitrogen, #32-8100) or anti-GAPDH (housekeeping control: 1:10,000; Merck, #MAB374). The following day, the membranes were incubated with the corresponding HRP-conjugated secondary antibody, and signal was visualized by chemiluminescence using Immobilon Western HRP Substrate Classico (Sigma-Aldrich, #WBLUCO500) and the ChemiDoc MP system (Bio-Rad).

## References for Supplementary Information

1. Paxinos G, Watson C. *The Rat Brain in Stereotaxic Coordinates, 4th Ed.*; 1998. doi:10.1017/CBO9781107415324.004
2. Tatulli G, Mitro N, Cannata SM, et al. Intermittent Fasting Applied in Combination with Rotenone Treatment Exacerbates Dopamine Neurons Degeneration in Mice. *Front Cell Neurosci.* 2018;12:4. doi:10.3389/fncel.2018.00004
3. Vermilyea SC, Guthrie S, Hernandez I, Bondarenko V, Emborg ME.  $\alpha$ -Synuclein Expression Is Preserved in Substantia Nigra GABAergic Fibers of Young and Aged Neurotoxin-Treated Rhesus Monkeys. *Cell Transplant.* 2019;28(4):379-387. doi:10.1177/0963689719835794
4. Jiménez-Urbieta H, Gago B, Quiroga-Varela A, et al. Pramipexole-induced impulsivity in mildparkinsonian rats: a model of impulse control disorders in Parkinson's disease. *Neurobiol Aging.* 2019;75:126-135. doi:10.1016/j.neurobiolaging.2018.11.021
5. Rodríguez-Chinchilla T, Quiroga-Varela A, Molinet-Drona F, et al. [(18)F]-DPA-714 PET as a specific in vivo marker of early microglial activation in a rat model of progressive dopaminergic degeneration. *Eur J Nucl Med Mol Imaging.* 2020;47(11):2602-2612. doi:10.1007/s00259-020-04772-4
6. Shevchenko A, Tomas H, Havlis J, Olsen J V, Mann M. In-gel digestion for mass spectrometric characterization of proteins and proteomes. *Nat Protoc.* 2006;1(6):2856-2860. doi:10.1038/nprot.2006.468
7. Shilov I V, Seymour SL, Patel AA, et al. The Paragon Algorithm, a next generation search engine that uses sequence temperature values and feature probabilities to identify peptides from tandem mass spectra. *Mol Cell Proteomics.* 2007;6(9):1638-1655. doi:10.1074/mcp.T600050-MCP200
8. Tang WH, Shilov I V, Seymour SL. Nonlinear fitting method for determining local false discovery rates from decoy database searches. *J Proteome Res.* 2008;7(9):3661-3667. doi:10.1021/pr070492f
9. Gillet LC, Navarro P, Tate S, et al. Targeted data extraction of the MS/MS spectra generated by data-independent acquisition: a new concept for consistent and

- accurate proteome analysis. *Mol Cell Proteomics*. 2012;11(6):O111.016717. doi:10.1074/mcp.O111.016717
10. Zhou Y, Zhou B, Pache L, et al. Metascape provides a biologist-oriented resource for the analysis of systems-level datasets. *Nat Commun*. 2019;10(1):1523. doi:10.1038/s41467-019-09234-6
  11. Oughtred R, Stark C, Breitkreutz BJ, et al. The BioGRID interaction database: 2019 update. *Nucleic Acids Res*. 2019;47(D1):D529-D541. doi:10.1093/nar/gky1079
  12. Koopmans F, van Nierop P, Andres-Alonso M, et al. SynGO: An Evidence-Based, Expert-Curated Knowledge Base for the Synapse. *Neuron*. 2019;103(2):217-234.e4. doi:10.1016/j.neuron.2019.05.002
  13. Frezza C, Cipolat S, Scorrano L. Organelle isolation: Functional mitochondria from mouse liver, muscle and cultured fibroblasts. *Nat Protoc*. 2007;2(2):287-295. doi:10.1038/nprot.2006.478
  14. Nagata T, Redman RS, Lakshman R. Isolation of intact nuclei of high purity from mouse liver. *Anal Biochem*. 2010;398(2):178-184. doi:10.1016/j.ab.2009.11.017
